# Supplementary material
Source: Research Square preprint supplement (doi:10.21203/rs.3.rs-9855076/v1)
Supplement: Supplementary file 1 [file 2141e15ea1c7cd9a44130bbb.pdf]

# **SUPPLEMENTARY INFORMATION**

## **Schools in the footprint of transition mineral extraction**

**Nicolás C. Zanetta-Colombo**

**Department of Geography, South Asia Institute, Heidelberg University,  
Voßstr. 2 - Building 4130  
D-69115 Heidelberg, Germany**

**Correspondence: [nicolaszanetta@gmail.com](mailto:nicolaszanetta@gmail.com)**

**This Supplementary Information contains:**

**Supplementary Note 1  
Supplementary Figures 1–3  
Supplementary Tables 1–8**

## Supplementary Note 1 | Indicative interval for the global exposed-child estimate.

The central estimate of 3.91 million primary-school-aged children whose schools fall within 10 km of an active ETM operation derives from the country-stratified proxy described in Methods. For each host country, the national primary-school-aged population is divided by the total Giga school count to obtain an implicit children-per-school ratio, which is then multiplied by the country's count of mine-proximate schools and adjusted by the primary net enrolment rate. The point estimate is reported in the main text. The 3 to 6 million range reflects plausible variation around this value, dominated by three sources of uncertainty.

Average school size varies substantially within countries. In many Andean and sub-Saharan contexts, small rural unidocente schools coexist with large urban institutions, and the proxy collapses this variation into a single national mean. A  $\pm 30\%$  perturbation of the country-level children-per-school ratio shifts the global estimate to approximately 2.7–5.1 million.

A second source is uneven Giga school coverage. Coverage relative to UNESCO institute for Statistics national totals exceeds 90% in some countries (Senegal, Liberia, several Latin American cases) and falls below 25% in others (Indonesia, Democratic Republic of the Congo). Under-coverage inflates the implicit children-per-school ratio, which partially compensates the under-count of exposed schools. The net direction of bias at global aggregation is uncertain. A correction that assumes proportional under-counting in low-coverage countries lifts the central estimate toward 4.6 million.

Net enrolment ratios introduce a third source of variation, ranging from 44% to 99% across the sample. The proxy applies the country-level value uniformly to all exposed schools in that country. In several high-exposure countries with above-average rural school participation (Peru, Zambia, Mexico), this approach may slightly understate exposure; in others (Liberia, Mali) it may overstate it.

Combining these three sources non-redundantly yields a plausible range of 3.0 to 6.0 million exposed children. The central estimate of 3.91 million represents the most defensible point value under the stated assumptions. The interval is indicative rather than a formal confidence interval, reflecting parametric uncertainty in the proxy rather than sampling variance.

**Supplementary Figure 1 | Commodity composition of school–mine proximity by country.** Distribution of mine-proximate schools (10-km buffer) by the primary commodity of the nearest active operation, for the top 20 host countries by absolute exposure. Commodities representing at least 1% of global exposure are shown. Cell colour scales logarithmically with the number of exposed schools; numerical labels are shown for cells containing 100 or more schools. Countries are ordered from top to bottom by total exposed schools, and commodities from left to right by global share. National commodity profiles vary substantially: copper-associated operations dominate exposure in Peru (9,495 schools), gold and silver together account for most exposure in Mexico (2,676 and 2,493 schools), nickel drives the Philippine pattern (392 schools), and iron ore shapes exposure in Brazil (603 schools).

**Supplementary Figure 2 | Commodity composition of school–mine proximity by country**

Top 20 host countries (by absolute exposure) × commodities representing ≥1% of global exposure, 10-km buffer

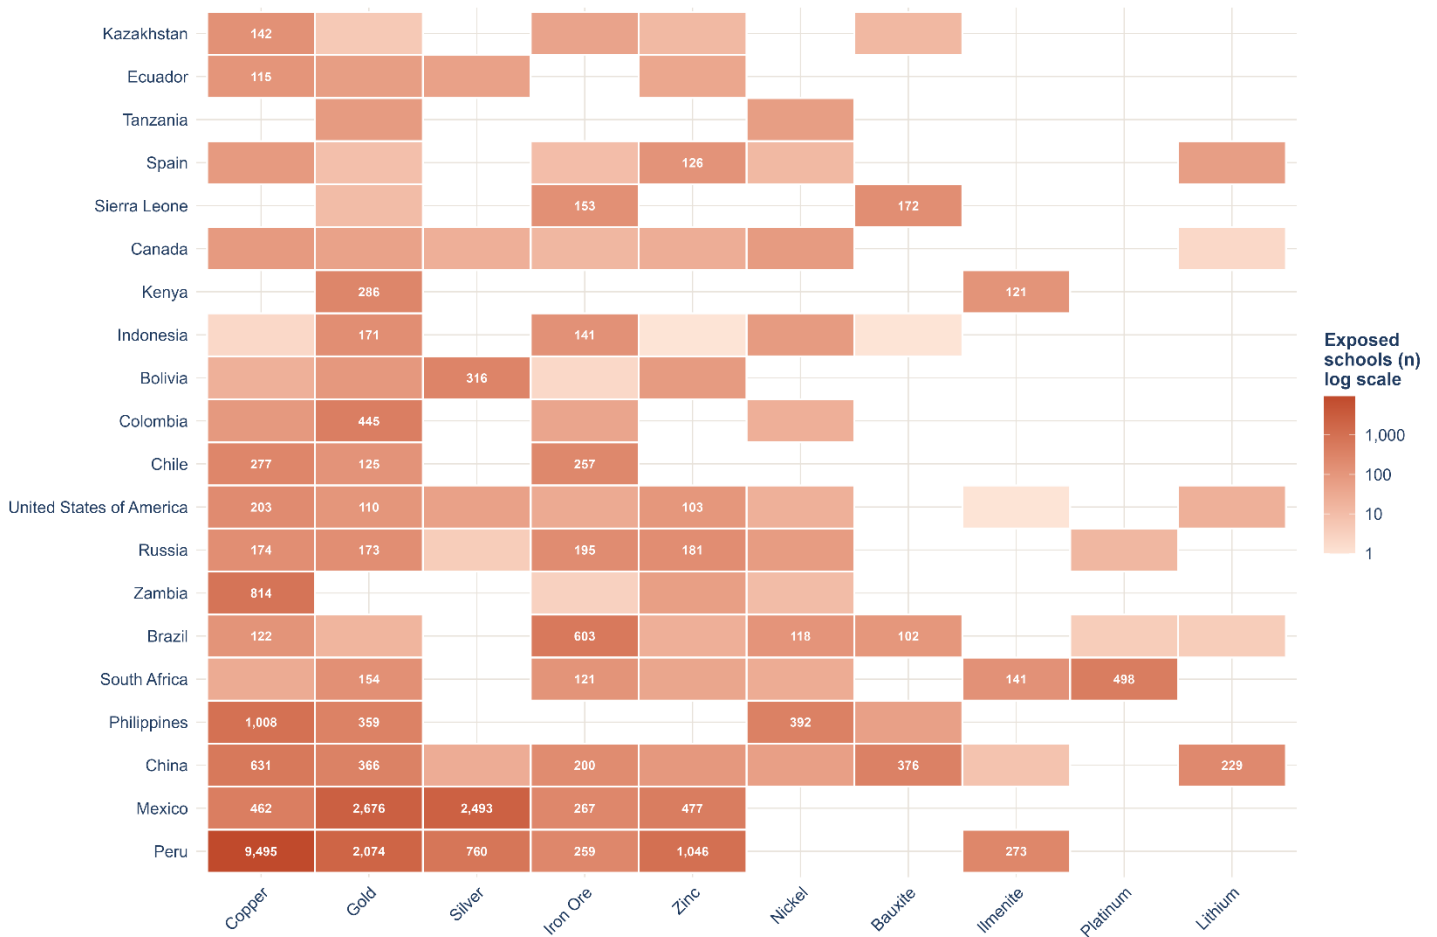

Countries ordered by total exposed schools (top to bottom). Commodities ordered by global share (left to right).

**Supplementary Figure 2 | Projected exposed children by country, 2026–2040.** Projected number of primary-school-aged children whose schools lie within 10 km of an active energy transition mineral operation, for the top 12 countries by absolute increase under the International Energy Agency Net Zero Emissions scenario. Trajectories are computed by linear interpolation between the 2026 baseline (current exposure) and the 2040 projection (current exposure scaled by commodity-specific demand multipliers; Supplementary Table 5). Demographic structure is held constant. The y-axis uses a logarithmic scale to improve visual separation across the full range of country values. The Philippines shows the largest absolute increase under the NZE pathway, reflecting projected nickel demand growth. Mali registers a smaller absolute change but the steepest proportional trajectory, anchored in expanding lithium and graphite operations.

**Supplementary Figure 3 | Projected exposed children by country, 2026–2040**

Top 12 countries by absolute increase under IEA Net Zero Emissions pathway

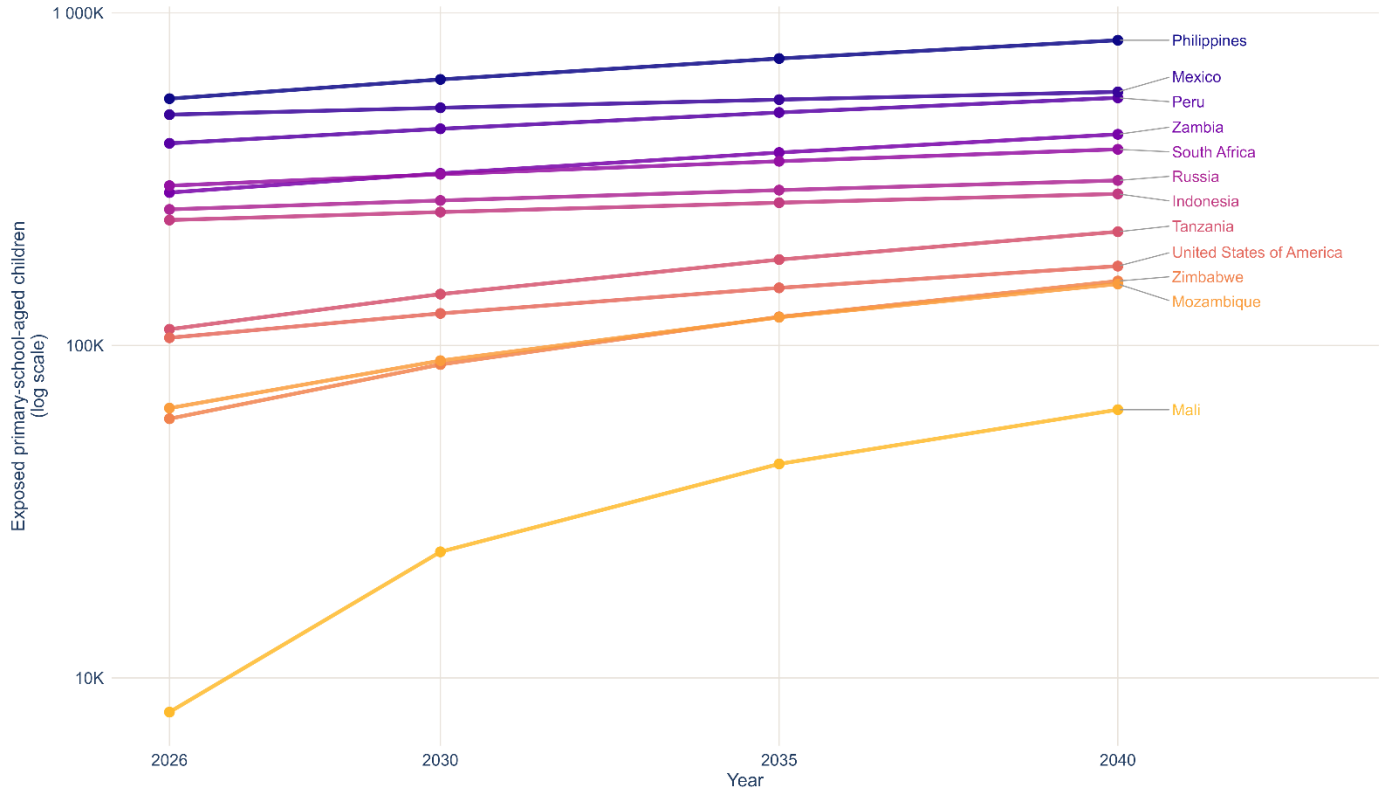

Linear interpolation between 2026 (current) and 2040 (projected). Demographic structure held constant.

**Supplementary Figure 3 | Sensitivity of principal findings to buffer radius.** Robustness of the principal findings across alternative buffer radii of 5, 10 and 20 km around each active energy transition mineral operation. a, Absolute number of schools located within each buffer radius (n). b, Proportion of exposed schools located within recognised Indigenous territories and peasant territories at each buffer radius. c, Proportion of exposed schools located in countries within Environmental Performance Index quartiles 2 and 3 (the middle-tier governance trap) and proportion of exposed schools whose nearest mining operation extracts copper, gold or silver. Territorial concentration on Indigenous and peasant lands, middle-tier governance concentration and commodity composition remain stable across buffer choices.

**Supplementary Figure 1 | Sensitivity of principal findings to buffer radius**

Robustness of exposure metrics, territorial concentration and governance patterns across 5, 10 and 20 km

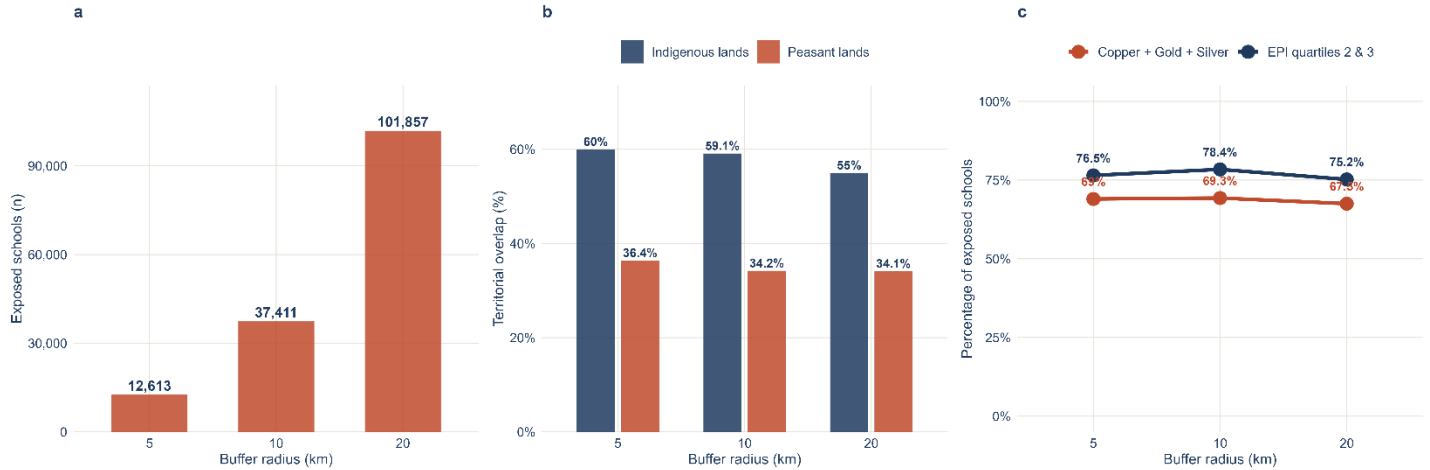

Principal findings of the analysis are stable across buffer choices. Source: own computation.

**Supplementary Table 1 | Global distribution of school–mine proximity across buffer radii.** Number and percentage of schools located within 5, 10 and 20 km of an active energy transition mineral (ETM) operation, proportional overlap on Indigenous and peasant territories at each buffer, and estimated exposed primary-school-aged children at the 10-km buffer. Total sample: 1,291,773 schools across 49 countries.

| Buffer radius | Schools (total) | Schools (exposed) | Exposed (%) | Countries with exposure | Indigenous lands (%) | Peasant lands (%) | Children exposed (millions) | Notes                                          |
|---------------|-----------------|-------------------|-------------|-------------------------|----------------------|-------------------|-----------------------------|------------------------------------------------|
| 5 km          | 1,291,773       | 12,613            | 1.0         | 46                      | 60.0                 | 36.4              | —                           | Primary radius lower bound (sensitivity)       |
| 10 km         | 1,291,773       | 37,411            | 2.9         | 48                      | 59.1                 | 34.2              | 3.91                        | Primary 10-km buffer used throughout main text |
| 20 km         | 1,291,773       | 101,857           | 7.9         | 48                      | 55.0                 | 34.1              | —                           | Primary radius upper bound (sensitivity)       |

**Supplementary Table 2 | Country-level school–mine proximity at the 10-km buffer.** Total schools, schools within 10 km of an active ETM operation, percentage exposed, estimated exposed primary-school-aged children, estimated exposed children living below the US\$6.85-per-day poverty line, Environmental Performance Index (EPI) 2024 score and quartile, ND-GAIN climate vulnerability, double-vulnerability status, and mineral rents as percentage of GDP, reported for each country. Sorted by absolute number of exposed schools.

| Country                  | ISO3 | Total schools | Exposed schools (10 km) | Exposed (%) | Estimated children exposed | Estimated children below US\$6.85/day | EPI score (2024) | EPI quartile | ND-GAIN vulnerability | Double vulnerable | Mineral rents (% GDP) |
|--------------------------|------|---------------|-------------------------|-------------|----------------------------|---------------------------------------|------------------|--------------|-----------------------|-------------------|-----------------------|
| Peru                     | PER  | 108,515       | 14,015                  | 12.9        | 405,307                    | 146,721                               | 46.50            | 3            | 0.409                 | No                | 12.1                  |
| Mexico                   | MEX  | 159,541       | 6,450                   | 4.0         | 494,297                    | 105,780                               | 44.20            | 2            | 0.387                 | No                | 1.4                   |
| China                    | CHN  | 61,224        | 2,494                   | 4.1         | —                          | —                                     | 35.40            | 1            | 0.382                 | No                | 0.5                   |
| Philippines              | PHL  | 39,913        | 1,820                   | 4.6         | 552,187                    | 324,134                               | 32.10            | 1            | 0.444                 | Yes               | 1.5                   |
| South Africa             | ZAF  | 25,539        | 1,339                   | 5.2         | 302,326                    | 180,186                               | 42.70            | 2            | 0.395                 | No                | 3.8                   |
| Brazil                   | BRA  | 165,952       | 1,257                   | 0.8         | 121,637                    | 25,057                                | 53               | 3            | 0.369                 | No                | 4.5                   |
| Zambia                   | ZMB  | 12,177        | 1,194                   | 9.8         | 288,246                    | 270,951                               | 46.70            | 3            | 0.485                 | Yes               | 28.3                  |
| Russia                   | RUS  | 36,926        | 1,004                   | 2.7         | 256,496                    | 2,308                                 | 46.70            | 3            | 0.324                 | No                | 2.0                   |
| United States of America | USA  | 143,404       | 678                     | 0.5         | 105,444                    | 1,898                                 | 57.20            | 4            | 0.312                 | No                | 0.1                   |
| Chile                    | CHL  | 12,826        | 663                     | 5.2         | 65,689                     | 2,956                                 | 49.60            | 3            | 0.332                 | No                | 16.2                  |
| Colombia                 | COL  | 46,645        | 636                     | 1.4         | 54,333                     | 20,103                                | 49.70            | 3            | 0.405                 | No                | 0.9                   |
| Bolivia                  | BOL  | 15,660        | 570                     | 3.6         | 49,985                     | 8,697                                 | 45.30            | 2            | 0.451                 | Yes               | 5.9                   |
| Indonesia                | IDN  | 48,378        | 442                     | 0.9         | 238,265                    | 155,349                               | 33.60            | 1            | 0.430                 | No                | 1.9                   |
| Kenya                    | KEN  | 29,700        | 439                     | 1.5         | 98,285                     | 88,555                                | 36.90            | 1            | 0.500                 | Yes               | 0.0                   |
| Canada                   | CAN  | 15,313        | 378                     | 2.5         | 61,534                     | 369                                   | 61.10            | 4            | 0.282                 | No                | 1.2                   |
| Sierra Leone             | SLE  | 11,941        | 363                     | 3.0         | 39,270                     | 35,932                                | 39.90            | 2            | 0.597                 | Yes               | 0.2                   |
| Spain                    | ESP  | 34,441        | 342                     | 1.0         | 24,388                     | 561                                   | 64               | 4            | 0.305                 | No                | 0.1                   |
| Tanzania                 | TZA  | 27,826        | 328                     | 1.2         | 111,830                    | 102,325                               | 43.60            | 2            | 0.516                 | Yes               | 4.0                   |
| Ecuador                  | ECU  | 9,188         | 277                     | 3.0         | 48,640                     | 14,641                                | 51.30            | 3            | 0.461                 | Yes               | 0.0                   |
| Kazakhstan               | KAZ  | 6,913         | 244                     | 3.5         | 74,173                     | 11,274                                | 47.80            | 3            | 0.316                 | No                | 9.1                   |
| Sweden                   | SWE  | 10,578        | 231                     | 2.2         | 15,554                     | 233                                   | 70.30            | 4            | 0.317                 | No                | 1.0                   |
| Uzbekistan               | UZB  | 10,438        | 210                     | 2.0         | 86,098                     | 10,676                                | 42.60            | 2            | 0.359                 | No                | 8.5                   |
| Turkiye                  | TUR  | 16,694        | 204                     | 1.2         | 78,811                     | 3,231                                 | 37.20            | 1            | 0.375                 | No                | 0.6                   |
| Australia                | AUS  | 10,338        | 194                     | 1.9         | 35,105                     | 527                                   | 63.10            | 4            | 0.316                 | No                | 10.5                  |
| Zimbabwe                 | ZWE  | 7,913         | 186                     | 2.4         | 60,187                     | 51,881                                | 51.60            | 3            | 0.498                 | Yes               | 4.2                   |
| Portugal                 | PRT  | 8,259         | 184                     | 2.2         | 11,903                     | 262                                   | 61.90            | 4            | 0.318                 | No                | 0.1                   |
| Ghana                    | GHA  | 34,709        | 151                     | 0.4         | 18,488                     | —                                     | 36.90            | 1            | 0.448                 | Yes               | 5.2                   |

| Country         | ISO3 | Total schools | Exposed schools (10 km) | Exposed (%) | Estimated children exposed | Estimated children below US\$6.85/day | EPI score (2024) | EPI quartile | ND-GAIN vulnerability | Double vulnerable | Mineral rents (% GDP) |
|-----------------|------|---------------|-------------------------|-------------|----------------------------|---------------------------------------|------------------|--------------|-----------------------|-------------------|-----------------------|
| Dem. Rep. Congo | COD  | 7,291         | 145                     | 2.0         | —                          | —                                     | 39.50            | 2            | 0.561                 | Yes               | 28.8                  |
| Mozambique      | MOZ  | 12,865        | 144                     | 1.1         | 64,781                     | 62,384                                | 39               | 2            | 0.493                 | Yes               | 0.1                   |
| Argentina       | ARG  | 47,558        | 117                     | 0.3         | 9,636                      | 1,465                                 | 47               | 3            | 0.383                 | No                | 0.6                   |
| Serbia          | SRB  | 3,887         | 111                     | 2.9         | 10,180                     | 916                                   | 49.80            | 3            | 0.422                 | No                | 0.7                   |
| Liberia         | LBR  | 4,962         | 96                      | 1.9         | 7,599                      | —                                     | 34.30            | 1            | 0.538                 | Yes               | 5.4                   |
| Finland         | FIN  | 2,505         | 95                      | 3.8         | 12,304                     | 49                                    | 73.80            | 4            | 0.280                 | No                | 0.1                   |
| Romania         | ROU  | 18,142        | 78                      | 0.4         | 4,234                      | 216                                   | 57.30            | 4            | 0.412                 | No                | 0.0                   |
| Greece          | GRC  | 12,100        | 55                      | 0.5         | 2,456                      | 79                                    | 67.30            | 4            | 0.337                 | No                | 0.1                   |
| Bulgaria        | BGR  | 3,843         | 42                      | 1.1         | 3,523                      | 155                                   | 56.20            | 4            | 0.354                 | No                | 0.6                   |
| Senegal         | SEN  | 14,696        | 38                      | 0.3         | 5,508                      | 4,329                                 | 43.80            | 2            | 0.535                 | Yes               | 2.9                   |
| Mali            | MLI  | 11,810        | 35                      | 0.3         | 7,892                      | 6,992                                 | 34.50            | 1            | 0.576                 | Yes               | 16.2                  |
| Norway          | NOR  | 3,600         | 35                      | 1.0         | 3,504                      | 14                                    | 69.90            | 4            | 0.256                 | No                | 0.0                   |
| Madagascar      | MDG  | 3,488         | 29                      | 0.8         | 39,898                     | 38,541                                | 30.10            | 1            | 0.558                 | Yes               | 0.0                   |
| Mongolia        | MNG  | 863           | 25                      | 2.9         | 12,846                     | 3,134                                 | 37.20            | 1            | 0.365                 | No                | 26.6                  |
| Guinea          | GIN  | 15,284        | 20                      | 0.1         | 2,401                      | 1,839                                 | 36.50            | 1            | 0.529                 | Yes               | 0.0                   |
| Burkina Faso    | BFA  | 5,379         | 17                      | 0.3         | 9,787                      | 8,847                                 | 42.20            | 2            | 0.521                 | Yes               | 15.4                  |
| New Caledonia   | NCL  | 326           | 13                      | 4.0         | —                          | —                                     | —                | —            | —                     | No                | 16.8                  |
| Cote d'Ivoire   | CIV  | 3,120         | 8                       | 0.3         | 12,092                     | 9,782                                 | 42.90            | 2            | 0.489                 | Yes               | 2.5                   |
| Mauritania      | MRT  | 2,739         | 6                       | 0.2         | 1,539                      | 1,096                                 | 34.60            | 1            | 0.578                 | Yes               | 9.6                   |
| Venezuela       | VEN  | 4,099         | 5                       | 0.1         | 3,092                      | —                                     | 53.30            | 3            | 0.373                 | No                | 0.1                   |
| Kyrgyzstan      | KGZ  | 2,080         | 4                       | 0.2         | 1,614                      | 1,053                                 | 42.80            | 2            | 0.311                 | No                | 11.2                  |
| Suriname        | SUR  | 185           | 0                       | 0.0         | 0                          | 0                                     | 56.90            | 4            | 0.404                 | No                | 0.0                   |

Suriname (SUR) hosts ETM project entries in the Owen et al. catalogue but no schools fell within any buffer radius. Em dashes (—) indicate countries lacking complete World Bank demographic data.

**Supplementary Table 3 | Commodity composition of school–mine proximity at the 10-km buffer.** Distribution of 37,411 mine-proximate schools by primary commodity of the nearest active operation, ranked by absolute number of exposed schools. The table also reports cumulative percentages and the subtotal corresponding to the seven energy transition minerals identified by the International Energy Agency: copper, nickel, lithium, lanthanides and rare earth elements, manganese, cobalt, and graphite.

| Commodity           | Exposed schools | Share of total (%) | Cumulative (%) |
|---------------------|-----------------|--------------------|----------------|
| Copper              | 14,253          | 38.1               | 38.1           |
| Gold                | 7,748           | 20.7               | 58.8           |
| Silver              | 3,929           | 10.5               | 69.3           |
| Iron Ore            | 2,550           | 6.8                | 76.1           |
| Zinc                | 2,441           | 6.5                | 82.7           |
| Nickel              | 1,135           | 3.0                | 85.7           |
| Bauxite             | 749             | 2.0                | 87.7           |
| Ilmenite            | 652             | 1.7                | 89.4           |
| Platinum            | 554             | 1.5                | 90.9           |
| Lithium             | 464             | 1.2                | 92.1           |
| Lanthanides         | 369             | 1.0                | 93.1           |
| Manganese           | 359             | 1.0                | 94.1           |
| Lead                | 352             | 0.9                | 95.0           |
| Tin                 | 348             | 0.9                | 96.0           |
| Chromite            | 219             | 0.6                | 96.5           |
| Cobalt              | 205             | 0.6                | 97.1           |
| Tungsten            | 203             | 0.5                | 97.6           |
| Graphite            | 191             | 0.5                | 98.2           |
| Molybdenum          | 155             | 0.4                | 98.6           |
| Vanadium            | 131             | 0.3                | 98.9           |
| Heavy Mineral Sands | 101             | 0.3                | 99.2           |
| Niobium             | 96              | 0.3                | 99.4           |
| Phosphate           | 71              | 0.2                | 99.6           |
| U3O8                | 60              | 0.2                | 99.8           |
| Rutile              | 29              | 0.1                | 99.9           |
| Tantalum            | 28              | 0.1                | 99.9           |
| Titanium            | 9               | 0.0                | 100.0          |
| Palladium           | 7               | 0.0                | 100.0          |
| Potash              | 2               | 0.0                | 100.0          |

| Commodity                       | Exposed schools | Share of total (%) | Cumulative (%) |
|---------------------------------|-----------------|--------------------|----------------|
| Antimony                        | 1               | 0.0                | 100.0          |
| <b>ETM-classified subtotal*</b> | <b>16,976</b>   | <b>45.4</b>        | <b>—</b>       |

\*ETM = energy transition minerals as identified by the International Energy Agency.

**Supplementary Table 4 | Spearman rank correlations between exposure metrics and country covariates.** Spearman correlation coefficients ( $\rho$ ), two-tailed p-values, and sample sizes for associations between the proportion of schools within 10 km of an active ETM operation (% exposed) and the estimated number of exposed primary-school-aged children, and 15 country-level covariates. Sample: up to n = 49 host countries (n varies with covariate availability).

| Covariate                          | $\rho$ (% exposed) | p (% exposed) | n (% exposed) | $\rho$ (children exposed) | p (children exposed) | n (children exposed) |
|------------------------------------|--------------------|---------------|---------------|---------------------------|----------------------|----------------------|
| EPI overall score (2024)           | 0.033              | 0.823         | 48            | -0.180                    | 0.232                | 46                   |
| EPI Air Quality sub-score          | -0.403             | 0.004         | 48            | -0.517                    | <0.001               | 46                   |
| EPI Heavy Metals sub-score         | 0.264              | 0.070         | 48            | 0.147                     | 0.328                | 46                   |
| EPI Health sub-score               | -0.192             | 0.190         | 48            | -0.373                    | 0.011                | 46                   |
| EPI Waste Management sub-score     | 0.151              | 0.306         | 48            | -0.073                    | 0.628                | 46                   |
| Mineral rents (% of GDP)           | 0.287              | 0.045         | 49            | 0.246                     | 0.100                | 46                   |
| ND-GAIN overall index              | 0.217              | 0.139         | 48            | 0.041                     | 0.787                | 46                   |
| ND-GAIN vulnerability              | -0.154             | 0.295         | 48            | -0.043                    | 0.775                | 46                   |
| ND-GAIN readiness                  | 0.243              | 0.096         | 48            | 0.037                     | 0.808                | 46                   |
| Primary net enrolment rate         | 0.329              | 0.026         | 46            | 0.176                     | 0.241                | 46                   |
| Poverty headcount US\$2.15/day (%) | -0.185             | 0.223         | 45            | 0.136                     | 0.385                | 43                   |
| Poverty headcount US\$6.85/day (%) | -0.127             | 0.408         | 45            | 0.098                     | 0.531                | 43                   |
| GDP per capita (USD)               | 0.198              | 0.174         | 49            | 0.025                     | 0.870                | 46                   |
| Population aged 0-14 (%)           | -0.214             | 0.140         | 49            | 0.011                     | 0.940                | 46                   |
| Rural population (%)               | -0.168             | 0.247         | 49            | -0.082                    | 0.587                | 46                   |

*Bold associations (EPI Air Quality, Mineral rents) are statistically significant at  $p < 0.05$ . No multiple-comparison correction applied (see Methods).*

**Supplementary Table 5 | Commodity-specific demand multipliers under the IEA Net Zero Emissions scenario (2040).** Multipliers used to project 2040 school–mine proximity by commodity under the IEA Net Zero Emissions pathway, derived from the Global Critical Minerals Outlook 2024. Commodities with documented clean-energy demand pathways that the IEA does not report individually (silver, platinum, vanadium) received conservative scaled multipliers; those without a transition-driven demand pathway received a multiplier of 1.0. The table reports the resulting projected schools and absolute growth.

| Commodity           | Current exposed schools | NZE 2040 multiplier | Projected 2040 exposed schools | Absolute growth | Growth (%) |
|---------------------|-------------------------|---------------------|--------------------------------|-----------------|------------|
| Copper              | 14,253                  | 1.5                 | 21,380                         | 7,127           | 50         |
| Lithium             | 464                     | 9.0                 | 4,176                          | 3,712           | 800        |
| Silver              | 3,929                   | 1.3                 | 5,108                          | 1,179           | 30         |
| Nickel              | 1,135                   | 2.0                 | 2,270                          | 1,135           | 100        |
| Graphite            | 191                     | 4.0                 | 764                            | 573             | 300        |
| Zinc                | 2,441                   | 1.2                 | 2,929                          | 488             | 20         |
| Lanthanides         | 369                     | 2.0                 | 738                            | 369             | 100        |
| Platinum            | 554                     | 1.5                 | 831                            | 277             | 50         |
| Cobalt              | 205                     | 2.0                 | 410                            | 205             | 100        |
| Bauxite             | 749                     | 1.2                 | 899                            | 150             | 20         |
| Manganese           | 359                     | 1.4                 | 503                            | 144             | 40         |
| Vanadium            | 131                     | 1.5                 | 196                            | 65              | 50         |
| Tin                 | 348                     | 1.1                 | 383                            | 35              | 10         |
| Phosphate           | 71                      | 1.5                 | 106                            | 35              | 50         |
| Tungsten            | 203                     | 1.1                 | 223                            | 20              | 10         |
| Niobium             | 96                      | 1.2                 | 115                            | 19              | 20         |
| U3O8                | 60                      | 1.3                 | 78                             | 18              | 30         |
| Tantalum            | 28                      | 1.1                 | 31                             | 3               | 10         |
| Titanium            | 9                       | 1.2                 | 11                             | 2               | 20         |
| Gold                | 7,748                   | 1.0                 | 7,748                          | 0               | 0          |
| Iron Ore            | 2,550                   | 1.0                 | 2,550                          | 0               | 0          |
| Ilmenite            | 652                     | 1.0                 | 652                            | 0               | 0          |
| Lead                | 352                     | 1.0                 | 352                            | 0               | 0          |
| Chromite            | 219                     | 1.0                 | 219                            | 0               | 0          |
| Molybdenum          | 155                     | 1.0                 | 155                            | 0               | 0          |
| Heavy Mineral Sands | 101                     | 1.0                 | 101                            | 0               | 0          |
| Rutile              | 29                      | 1.0                 | 29                             | 0               | 0          |
| Palladium           | 7                       | 1.0                 | 7                              | 0               | 0          |
| Potash              | 2                       | 1.0                 | 2                              | 0               | 0          |

| Commodity | Current exposed schools | NZE 2040 multiplier | Projected 2040 exposed schools | Absolute growth | Growth (%) |
|-----------|-------------------------|---------------------|--------------------------------|-----------------|------------|
| Antimony  | 1                       | 1.2                 | 1                              | 0               | 20         |

**Supplementary Table 6 | Country-level projected school–mine proximity in 2040 (IEA NZE scenario).** Projected mine-proximate schools and exposed primary-school-aged children in 2040 under the IEA Net Zero Emissions pathway, computed by applying commodity-specific demand multipliers (Supplementary Table 5) to currently exposed schools at the 10-km buffer, reported for each country. Sorted by absolute additional exposed children. China, the Democratic Republic of the Congo and New Caledonia appear in the school projections but lack the complete World Bank demographic data required to project exposed children.

| Country                  | ISO3 | Schools (current) | Schools (projected 2040) | Growth factor | Children (current) | Children (projected 2040) | Additional children by 2040 |
|--------------------------|------|-------------------|--------------------------|---------------|--------------------|---------------------------|-----------------------------|
| Philippines              | PHL  | 1,820             | 2,728                    | 1.5           | 552,187            | 827,552                   | 275,365                     |
| Peru                     | PER  | 14,015            | 19,206                   | 1.4           | 405,307            | 555,440                   | 150,133                     |
| Zambia                   | ZMB  | 1,194             | 1,787                    | 1.5           | 288,246            | 431,355                   | 143,109                     |
| Tanzania                 | TZA  | 328               | 644                      | 2.0           | 111,830            | 219,705                   | 107,875                     |
| Zimbabwe                 | ZWE  | 186               | 483                      | 2.6           | 60,187             | 156,161                   | 95,975                      |
| Mozambique               | MOZ  | 144               | 340                      | 2.4           | 64,781             | 152,999                   | 88,218                      |
| South Africa             | ZAF  | 1,339             | 1,722                    | 1.3           | 302,326            | 388,869                   | 86,543                      |
| Mexico                   | MEX  | 6,450             | 7,552                    | 1.2           | 494,297            | 578,741                   | 84,444                      |
| United States of America | USA  | 678               | 1,113                    | 1.6           | 105,444            | 173,159                   | 67,715                      |
| Russia                   | RUS  | 1,004             | 1,227                    | 1.2           | 256,496            | 313,416                   | 56,920                      |
| Mali                     | MLI  | 35                | 284                      | 8.1           | 7,892              | 64,083                    | 56,191                      |
| Indonesia                | IDN  | 442               | 530                      | 1.2           | 238,265            | 285,594                   | 47,329                      |
| Spain                    | ESP  | 342               | 954                      | 2.8           | 24,388             | 68,036                    | 43,648                      |
| Canada                   | CAN  | 378               | 630                      | 1.7           | 61,534             | 102,491                   | 40,957                      |
| Brazil                   | BRA  | 1,257             | 1,646                    | 1.3           | 121,637            | 159,241                   | 37,604                      |
| Ghana                    | GHA  | 151               | 391                      | 2.6           | 18,488             | 47,849                    | 29,361                      |
| Uzbekistan               | UZB  | 210               | 274                      | 1.3           | 86,098             | 112,420                   | 26,321                      |
| Turkiye                  | TUR  | 204               | 266                      | 1.3           | 78,811             | 102,570                   | 23,759                      |
| Kazakhstan               | KAZ  | 244               | 322                      | 1.3           | 74,173             | 97,823                    | 23,650                      |
| Serbia                   | SRB  | 111               | 353                      | 3.2           | 10,180             | 32,375                    | 22,195                      |
| Ecuador                  | ECU  | 277               | 359                      | 1.3           | 48,640             | 63,004                    | 14,364                      |
| Chile                    | CHL  | 663               | 805                      | 1.2           | 65,689             | 79,749                    | 14,059                      |
| Australia                | AUS  | 194               | 270                      | 1.4           | 35,105             | 48,768                    | 13,662                      |
| Portugal                 | PRT  | 184               | 382                      | 2.1           | 11,903             | 24,693                    | 12,790                      |
| Madagascar               | MDG  | 29                | 38                       | 1.3           | 39,898             | 52,280                    | 12,382                      |
| Bolivia                  | BOL  | 570               | 697                      | 1.2           | 49,985             | 61,148                    | 11,163                      |
| Finland                  | FIN  | 95                | 179                      | 1.9           | 12,304             | 23,235                    | 10,931                      |
| Colombia                 | COL  | 636               | 714                      | 1.1           | 54,333             | 61,039                    | 6,706                       |

| Country         | ISO3 | Schools (current) | Schools (projected 2040) | Growth factor | Children (current) | Children (projected 2040) | Additional children by 2040 |
|-----------------|------|-------------------|--------------------------|---------------|--------------------|---------------------------|-----------------------------|
| Mongolia        | MNG  | 25                | 38                       | 1.5           | 12,846             | 19,526                    | 6,680                       |
| Sierra Leone    | SLE  | 363               | 397                      | 1.1           | 39,270             | 42,991                    | 3,721                       |
| Argentina       | ARG  | 117               | 159                      | 1.4           | 9,636              | 13,062                    | 3,426                       |
| Cote d'Ivoire   | CIV  | 8                 | 10                       | 1.3           | 12,092             | 15,115                    | 3,023                       |
| Sweden          | SWE  | 231               | 273                      | 1.2           | 15,554             | 18,362                    | 2,808                       |
| Guinea          | GIN  | 20                | 34                       | 1.7           | 2,401              | 4,130                     | 1,729                       |
| Norway          | NOR  | 35                | 51                       | 1.4           | 3,504              | 5,066                     | 1,562                       |
| Kenya           | KEN  | 439               | 445                      | 1.0           | 98,285             | 99,718                    | 1,433                       |
| Romania         | ROU  | 78                | 94                       | 1.2           | 4,234              | 5,103                     | 869                         |
| Mauritania      | MRT  | 6                 | 9                        | 1.5           | 1,539              | 2,309                     | 770                         |
| Burkina Faso    | BFA  | 17                | 18                       | 1.1           | 9,787              | 10,478                    | 691                         |
| Venezuela       | VEN  | 5                 | 6                        | 1.2           | 3,092              | 3,710                     | 618                         |
| Greece          | GRC  | 55                | 66                       | 1.2           | 2,456              | 2,966                     | 509                         |
| Kyrgyzstan      | KGZ  | 4                 | 5                        | 1.3           | 1,614              | 2,018                     | 404                         |
| Senegal         | SEN  | 38                | 38                       | 1.0           | 5,508              | 5,508                     | 0                           |
| Liberia         | LBR  | 96                | 96                       | 1.0           | 7,599              | 7,599                     | 0                           |
| Bulgaria        | BGR  | 42                | 42                       | 1.0           | 3,523              | 3,523                     | 0                           |
| China           | CHN  | 2,494             | 5,046                    | 2.0           | —                  | —                         | —                           |
| Dem. Rep. Congo | COD  | 145               | 220                      | 1.5           | —                  | —                         | —                           |
| New Caledonia   | NCL  | 13                | 25                       | 1.9           | —                  | —                         | —                           |

**Supplementary Table 7 | Sensitivity of principal findings to buffer radius selection.** Robustness of the principal findings across alternative buffer radii of 5, 10 and 20 km. The table reports total exposed schools, percentage of the global sample exposed, proportion of exposed schools within recognised Indigenous and peasant territories, and the combined share of copper-, gold- and silver-associated operations. These metrics remain consistent across buffer choices.

| Buffer radius          | Exposed schools | Exposed (%) | Indigenous lands (%) | Peasant lands (%) | Copper+Gold+Silver (%) |
|------------------------|-----------------|-------------|----------------------|-------------------|------------------------|
| 5 km                   | 12,613          | 1.0         | 60.0                 | 36.4              | 67.5                   |
| <b>10 km (primary)</b> | 37,411          | 2.9         | 59.1                 | 34.2              | 69.3                   |
| 20 km                  | 101,857         | 7.9         | 55.0                 | 34.1              | 67.4                   |

**Supplementary Table 8 | Sensitivity of principal findings to Giga dataset coverage.** Comparison of principal findings across four Giga coverage thresholds, retaining countries whose Giga school count meets or exceeds the stated percentage of UNESCO Institute for Statistics national totals. The middle-tier governance pattern is not attenuated by restricting to high-coverage countries. It intensifies. The positive correlation with mineral rents strengthens monotonically from  $\rho = 0.29$  to  $\rho = 0.48$ , the negative correlation with EPI Air Quality deepens from  $\rho = -0.35$  to  $\rho = -0.49$ , and the composite EPI overall score remains uncorrelated across all thresholds.

| Coverage threshold            | n countries | Exposed schools | Children (M) | Q2+Q3 (%) | $\rho$ Mineral rents | $\rho$ Mineral rents | $\rho$ EPI Air Quality | $\rho$ EPI Air Quality | $\rho$ EPI overall | $\rho$ EPI overall |
|-------------------------------|-------------|-----------------|--------------|-----------|----------------------|----------------------|------------------------|------------------------|--------------------|--------------------|
| Full sample (0%)              | 49          | 37,411          | 3.91         | 78.4      | 0.290                | 0.045                | -0.350                 | 0.013                  | 0.030              | 0.823              |
| $\geq 30\%$                   | 45          | 34,735          | 3.86         | 83.7      | 0.320                | 0.032                | -0.370                 | 0.013                  | 0.030              | 0.830              |
| $\geq 50\%$                   | 41          | 34,246          | 3.60         | 83.8      | 0.340                | 0.032                | -0.410                 | 0.008                  | 0.040              | 0.829              |
| <b><math>\geq 70\%</math></b> | 35          | 33,321          | 3.25         | 82.6      | 0.480                | 0.004                | -0.490                 | 0.004                  | -0.130             | 0.478              |

*The  $\geq 70\%$  threshold ( $n = 35$ ) is the restricted sample reported in the main text Results.*
